# Supplementary material for: Investigating differences in DOAS retrieval codes using MAD-CAT campaign data
Source: Copernicus journal article supplement (doi:10.5194/amt-2016-358), 2016-11-11
Supplement: Supplementary file [file amt-2016-358-AC1-supplement.pdf]

## ***Point-by-point answers to Anonymous Reviewer #1***

*Note: Reviewers comments are printed in black, author's replies in blue (and italic).*

### **General Evaluation**

Peters et al. present a comparison study on NO<sub>2</sub> slant column retrievals from a range of different DOAS retrieval codes on the same set of MAX-DOAS observations acquired during the 2013 MAD-CAT campaign. Results of NO<sub>2</sub> columns and RMS values from the retrieval codes, which are run with a basic set of harmonized settings for molecular absorption cross-sections and closure polynomials, are compared and a range of possible sources for their differences is investigated. Based on this study, a short list of recommendations is given as general guidance for DOAS retrievals to obtain high confidence/low RMS retrievals.

The paper is solidly written, and there is little to criticize in methodology and overall quality of presentation. My main criticism is that, at 27 journal pages, the manuscript is overly long for a study that concludes with five basic recommendations. The paper provides excellent insight into the workings of DOAS retrievals, and as such is valuable for both data providers and data users, but this reviewer strongly suggests that the discussion be tightened and the main part of the message conveyed more concisely.

*We would like to thank the reviewer for these general encouraging comments and evaluation. We also fully agree with the main criticism concerning the length of the study and tried to shorten it following the suggestions provided by the reviewer (see below).*

The meat of the paper is straight forward and relatively simple:

1. A set of MAX-DOAS observation from MAD-CAT was selected for a retrieval algorithm comparison.
2. A common set of basic spectral fitting settings was prescribed with which to run the retrieval codes.
3. Differences in NO<sub>2</sub> slant columns and RMS were found, relative to a reference retrieval.
4. The reference retrieval code was run with modified settings for five essential code elements - radiance reference spectrum, slit function, offset correction, IO correction, matrix inversion – to investigate their effect on the retrievals and to possibly explain the differences in the results.
5. The modified retrieval runs lead to the final recommendations, while the attempt to attribute differences between the codes to the investigated five sources is only moderately successful.

*Please note, INTA and NIWA found a fault in their retrieval code (which is a benefit of the present study) and repeated their data analysis, after the paper was published in AMT discussions. The new results are included in the revised manuscript as INTA2 and NIWA2 and a lot of differences, which could not be attributed to any of the performed tests before, disappeared. With this, almost all observed differences between groups could now be attributed to the performed tests (or attributed to faults in retrieval codes which are now corrected).*

The majority of the "take home messages" comes from Bullet 4 above, but the attribution of those effects in the actual differences observed between the results from the various retrieval codes remains qualitative at best. With this in mind, any figures and discussions relating primarily to relationships between the results from different codes - in particular figures 4 and 6 and their discussion - are non-essential and should be marked for removal.

*The attribution is much more successful in the revised manuscript after faults in retrieval codes have been corrected (see above), which is good for the "detection rate" but also good for participating groups. We agree that the paper needs to be shortened, but in our opinion the statistics reflected in figure 4 (and 6)*

*are essential as they document quantitatively the agreement between retrieval codes that can be expected – without them the manuscript would be purely qualitative. Therefore, we decided to skip figure 6 (with corresponding text) to tighten the manuscript, but to leave figure 4 demonstrating statistics and the quantitative agreement between groups. The basic results of figure 6 as well as results of different fit settings (which were not included as figures in the manuscript at all) are then summarized in Table 3 (which needs at least one figure to be understandable for the reader).*

Below are some more specific comments. Very few of these are copy-editorial, since the level of presentation of this paper is very high.

### **Recommendation**

The manuscript is acceptable for publication, but should undergo some tightening and add a few clarifications. Since there are no basic problems with methodology or presentation, a second round of review is not necessary.

### **Specific Comments**

#### *Retrieval Uncertainties*

While the paper compares NO<sub>2</sub> slant columns and retrieval RMS, no NO<sub>2</sub> slant column uncertainties are shown. Purely spectral minimization-based uncertainties are a combination of RMS and fitting covariances, and thus provide important information on the quality of the retrieved slant columns beyond the RMS.

*This is in general true. However, slant column errors are calculated from RMS, SCs, and covariance of the (pseudo-inverted) DOAS matrix. For this exercise, the DOAS matrix is (ideally) the same for all groups, as fit settings were prescribed and the same cross sections were used distributed to all groups (see above). Thus, an investigation of the fit errors would provide very little new insight beyond the comparison performed for SCs and RMS.*

*Nevertheless, an important aspect is how large slant column disagreements between groups are in comparison to slant column errors. This is mentioned in Sect 3.1 (stating in summary that NO<sub>2</sub> slant column differences between groups were found to be up to 2-3 times larger than typical slant column errors). We agree that this is a remarkable finding, and put it also in the conclusions of the revised manuscript.*

#### *Reference Cross-Section Wavelength Scale*

Three (admittedly very basic) questions regarding wavelength registration:

1. Does the IUPB MAX-DOAS instrument measure in vacuum or air?

*It measures in air.*

2. Which wavelength registration (vacuum or air) was used for the retrievals?

*Wavelength in air.*

3. Was it assured that all molecular and solar reference spectra were on the same type of wavelength registration as the MAX-DOAS spectra?

*All cross sections were converted to wavelength in air (unless they were already given in wavelength in air) before they were distributed to participating groups. It was prescribed to use the provided cross sections as summarized in Tab. 1. (However, even a potential error in the wavelength-conversion would affect all groups in the same way and should therefore have no influence on the objective of this study).*

#### *Slit Function*

The measured slit function as shown in Figure 8 is slightly asymmetric. Yet, no attempts are reported of

having fit an asymmetric Gaussian to the measurement for use in the retrievals. At least part of the comparison exercise utilized pre-convolved molecular absorption cross-sections, so this should have been an easy case to include. It is not very surprising that results from original and re-centered original slit function are virtually identical: the asymmetry should mainly manifest as a spectral shift, which is taken care of by the shift parameter during the retrieval process.

Regarding the differences introduced by removing the offset of 0.001: was the resulting slit function renormalized to the same area as the one with the offset?

*Yes, the slit function was of course re-normalized after an offset was subtracted. However, there seems to be a small misunderstanding as the value of 0.001 is not the subtracted offset (first column of Table 5) but the cut-off value (tests summarized in third column of Table 5) for the discrete convolution.*

*The reviewer is right, different centered slit functions should result in a shift of cross sections. However, in the DOAS test fits performed in this section, no shift between cross sections and optical depth was allowed (but the shift between I and IO will partly compensate for it). We included this statement and generally rephrased the whole section in order to increase readability and clarity.*

*Asymmetric slit function test: It is correct that some retrieval codes offer the possibility to fit more sophisticated line shape parameters taking into account potential asymmetry (as seen here) much better. The detailed use of the slit function was not included in the prescribed fit settings as being implemented differently in different retrieval codes. The tests performed here demonstrate in summary two extreme scenarios which characterize the maximum difference resulting from the slit function treatment, namely (1) using the (asymmetric) slit function as it is, or (2) fitting basic line parameters. The use of an asymmetric fitted slit function would clearly lead to a result in between these scenarios, but would not help a lot for the attribution of differences between groups to their sources as the exact implementations could not be reproduced here. We included this explicitly in the revised manuscript.*

#### *Section 4 "Understanding differences between retrieval codes"*

Ultimately, this is the most important section of the manuscript since it systematically investigates the effect of different fit settings on the retrieved slant columns and the resulting RMS. It is also here that the five recommendations in the Summary are derived. In principle, this exercise is independent of the MAD-CAT comparison. While the differences in results from the various retrieval codes are a good motivation to perform these tests, they are valuable in their own right, and more emphasis should be placed on this. By referring to this part of the study as "differences between retrieval codes", this reviewer believes that the importance of these tests is somewhat muddled and degraded. The reader would benefit from a clear statement of the type "differences between the harmonized MAD-CAT retrieval results prompted the team to systematically investigate effects of the non-harmonized aspects of the retrievals, with the aim to derive a key set of Best Practices recommendations". Since quantitative attribution of "what part of the differences originates from which non-harmonized retrieval setting" turns out to be unfeasible/unsuccessful, more emphasis should be placed on the derived recommendations for DOAS retrievals.

*We thank the reviewer for this good suggestion and changed section 4, now called "Sensitivity studies of non-harmonized retrieval aspects" accordingly. Similar changes have been made in the conclusions, the introduction, and the abstract as well. However, we think the MAD-CAT intercomparison results are more than a good motivation leading to these tests because (as mentioned above) after finding and eliminating additional faults in retrieval codes (unfortunately after publication in AMT discussions), almost all systematical differences between groups could now be attributed to sources found in section 4.*

## Editorial Comments

Line 122: suggest to reword as "real data without cross-instrumental bias", to avoid confusion with measurements free of instrumental bias.

*We rephrased this as: "The work reported here overcomes limitations from previous studies by using real measurements originating from a single instrument. This facilitates the study of the agreement between different retrieval codes on real data without instrumental biases between results from different groups."*

Figure 1 caption: suggest to include "(90° = Zenith)" for the benefit of readers less familiar with MAX-DOAS observation methodology.

*Thanks, we changed that figure accordingly.*

Figure 2: Use a different color for the fitted spectrum. Green and Blue are hard to distinguish.

*We changed the blue dashed line to red and increased the linewidth.*

Figure 2: What is the definition of "differential cross section", and is it optical "density", "depth", or "thickness"? None of these quantities would be expected have negative values, thus there has to be a reference point.

*The differential cross section is the absolute cross section minus a (fitted) polynomial. We clarified this in the revised manuscript. The optical density shown here is the differential optical density (same definition as above), which is also explicitly mentioned in the revised manuscript. In general, optical "thickness", "depth" and "density" are often mixed-up in the literature. Within this manuscript, we tried to use only "optical depth" (i.e. avoid thickness) and used "optical density" when referring to one specific trace gas only (while "depth" is used for the total absorption effects of all trace gases, i.e. the measured quantity  $\ln(I/I_0)$ ).*

Line 138: "However, these are normally the ones of interest".

*Changed.*

Line 171: " $r$ , the root mean square (RMS) of the fit residual, is an important quantity used within this study to identify and evaluate differences between the DOAS retrieval codes."

*No,  $r$  is not the root mean square of the fit residual, but it is the fit residual itself (as denoted in the corresponding equation and explained in the text). So the text was correct (remains unchanged).*

Line 229: either "groups participating in MAD-CAT" or "participating MAD-CAT groups".

*Thanks, changed to "groups participating in MAD-CAT".*

Line 305: delete "one" after "WCRS".

*Thanks, we deleted "one".*
